# Supplementary material
Source: Springer Nature journal article supplement (https://www.springermedizin.de/resource/supplementary/12974_2010_322_MOESM2_ESM.pdf/9601272)
Supplement: MOESM2 [file 9601272]

# A *Exploration of a Novel Juvenile*

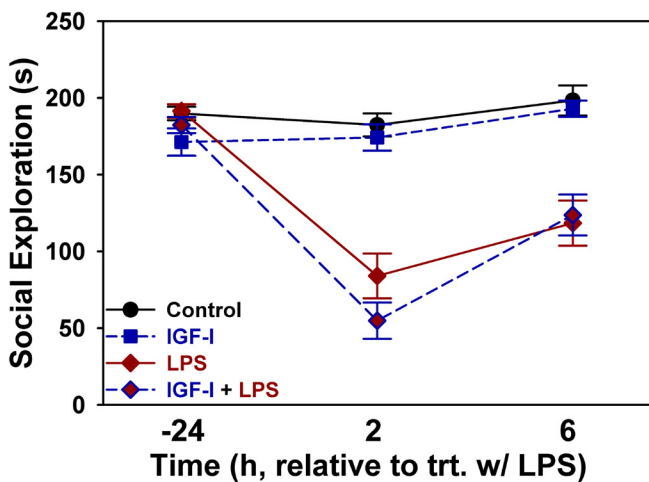

# B *Body Weight*

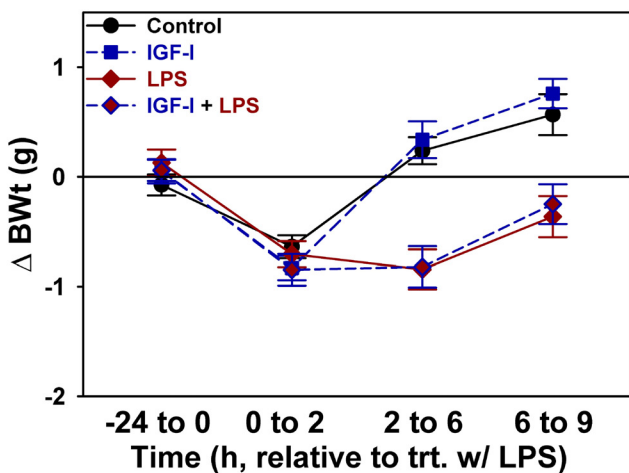

# C *Feed Intake*

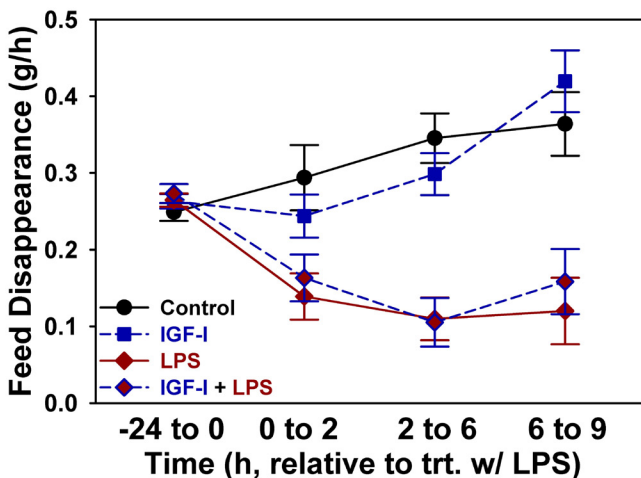

All three observations:  
Main effects of LPS and interaction with Time,  $p < 0.05$
